# Supplementary material for: Framing Feminicides—A Quantitative Content Analysis of News Stories in Four Colombian Newspapers
Source: MDPI journal article supplement (doi:10.3390/journalmedia3010010), 2022-02-08
Supplement: s1 [file s1]

Archive with 1 entries (1 files):
- journalmedia-1523414-supplementary.pdf
